# Supplementary material for: Theta-Gel-Reinforced Hydrogel Composites for Potential Tensile Load-Bearing Soft Tissue Repair Applications
Source: MDPI journal article supplement (doi:10.3390/jfb14060291), 2023-05-24
Supplement: s1 [file s1]

## SUPPLEMENTARY DOCUMENTS

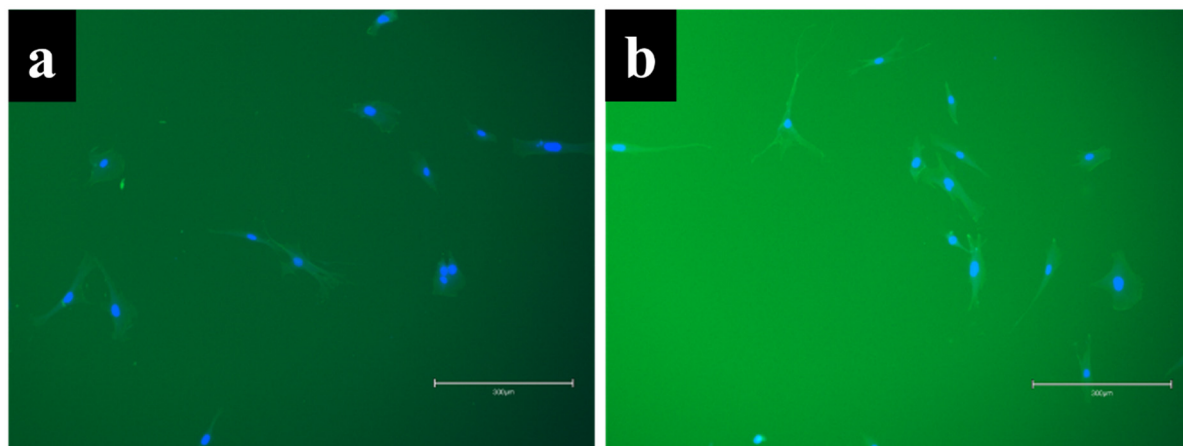

**Figure S1.** Live cell staining of murine fibroblasts after 7 days of culture on (a) DR-/FD+ and (b) DR+/FD+ theta-gels.
